# Supplementary material for: RAD51 135G>C substitution increases breast cancer risk in an ethnic-specific manner: a meta-analysis on 21236 cases and 19407 controls
Source: PubMed Central journal article supplement (PMC4479800; doi:10.1038/srep11588), 2015-06-25
Supplement: srep11588-s1.pdf [file srep11588-s1.pdf]

**RAD51 135G>C substitution increases breast cancer risk in an ethnic-specific manner: a meta-analysis on 21236 cases and 19407 controls**

Deepa Sekhar<sup>1</sup>, Singh Pooja<sup>2</sup>, Sandeep Kumar<sup>3</sup>, Singh Rajender<sup>1</sup>

**Supplementary table S1:** Characteristics and genotype data of the case-control studies included in the meta-analysis

| No. | Author's name                  | Year | Country   | Ethnicity  | Source           | GG   | GC   | CC | Total | GG   | GC   | CC | Total | P for HW equilibrium |
|-----|--------------------------------|------|-----------|------------|------------------|------|------|----|-------|------|------|----|-------|----------------------|
| 1   | Kuschel et al <sup>24</sup>    | 2002 | UK        | Caucasian  | Population based | 1904 | 255  | 13 | 2172  | 722  | 116  | 2  | 840   | 0.2344               |
| 2   | Blasiak et al <sup>20</sup>    | 2003 | Poland    | Caucasian  | Hospital based   | 11   | 28   | 7  | 46    | 21   | 35   | 4  | 60    | 0.0375*              |
| 3   | Kadouri et al <sup>25</sup>    | 2004 | UK        | Caucasian  | Hospital based   | 290  | 0    | 0  | 333   | 231  | 0    | 0  | 261   | 0*                   |
| 4   | Webb et al <sup>26</sup>       | 2005 | Australia | Mixed      | Population based | 1221 | 212  | 11 | 1444  | 676  | 104  | 8  | 788   | 0.0822               |
| 5   | Dufloth et al <sup>21</sup>    | 2005 | Brazil    | Mixed      | Hospital based   | 144  | 24   | 1  | 169   | 103  | 13   | 3  | 119   | 0.0051               |
| 6   | Lee et al <sup>27</sup>        | 2005 | Korea     | East-Asian | Hospital based   | 611  | 143  | 28 | 782   | 450  | 123  | 14 | 587   | 0.1142               |
| 7   | Silwinski et al <sup>10</sup>  | 2005 | Poland    | Caucasian  | Not reported     | 108  | 38   | 4  | 150   | 106  | 41   | 3  | 150   | 0.6735               |
| 8   | Romanowicz et al <sup>6</sup>  | 2006 | Poland    | Caucasian  | Hospital based   | 31   | 40   | 29 | 100   | 21   | 48   | 37 | 106   | 0.4509               |
| 9   | Tarasov et al <sup>28</sup>    | 2006 | Russia    | Caucasian  | Not reported     | 111  | 36   | 4  | 151   | 148  | 41   | 2  | 191   | 0.6505               |
| 10  | Chang et al <sup>29</sup>      | 2006 | Taiwan    | East Asian | Hospital based   | 116  | 73   | 0  | 189   | 284  | 137  | 0  | 421   | 0*                   |
| 11  | Costa et al <sup>2</sup>       | 2007 | Portugal  | Caucasian  | Hospital based   | 216  | 45   | 4  | 265   | 558  | 86   | 2  | 646   | 0.4909               |
| 12  | Jara et al <sup>30</sup>       | 2007 | Chile     | Mixed      | Population based | 113  | 16   | 2  | 131   | 222  | 25   | 0  | 247   | 0.4021               |
| 13  | Antoniou et al <sup>21</sup>   | 2007 | UK        | Mixed      | Not reported     | 7683 | 1134 | 76 | 8893  | 6977 | 1130 | 38 | 8145  | 0.283                |
| 14  | Jakubowska et al <sup>32</sup> | 2007 | Poland    | Caucasian  | Hospital based   | 210  | 48   | 0  | 258   | 188  | 68   | 2  | 258   | 0.1169               |
| 15  | Pharoah et al <sup>33</sup>    | 2007 | Multiple  | Caucasian  | Population based | 1911 | 236  | 13 | 2160  | 1995 | 257  | 14 | 2266  | 0.0724               |
| 16  | Hu et al <sup>34</sup>         | 2008 | China     | East Asian | Not reported     | 35   | 29   | 7  | 71    | 49   | 34   | 2  | 85    | 0.1602               |
| 17  | Synowiec et al <sup>11</sup>   | 2008 | Poland    | Caucasian  | Population based | 18   | 10   | 13 | 41    | 17   | 27   | 4  | 48    | 0.138                |
| 18  | Brooks et al <sup>19</sup>     | 2008 | USA       | Mixed      | Population based | 516  | 88   | 7  | 611   | 513  | 88   | 10 | 611   | 0.0086*              |
| 19  | Krupa et al <sup>35</sup>      | 2009 | Poland    | Caucasian  | Hospital based   | 91   | 33   | 11 | 135   | 105  | 63   | 7  | 175   | 0.5172               |
| 20  | Jakubowska et al <sup>36</sup> | 2009 | Poland    | Caucasian  | Hospital based   | 785  | 207  | 15 | 1007  | 822  | 232  | 15 | 1069  | 0.7644               |
| 21  | Jara et al <sup>37</sup>       | 2010 | Chile     | Mixed      | Population based | 232  | 33   | 2  | 267   | 441  | 58   | 1  | 500   | 0.5258               |

|    |                                 |      |        |            |                |     |     |     |              |     |     |     |              |         |
|----|---------------------------------|------|--------|------------|----------------|-----|-----|-----|--------------|-----|-----|-----|--------------|---------|
| 22 | Romanowicz et al <sup>138</sup> | 2010 | Poland | Caucasian  | Hospital based | 141 | 69  | 10  | 220          | 157 | 58  | 5   | 220          | 0.8955  |
| 23 | Akisik et al <sup>39</sup>      | 2011 | Turkey | Caucasian  | Hospital based | 125 | 20  | 2   | 147          | 62  | 57  | 1   | 120          | 0.002*  |
| 24 | Romanowicz et al <sup>140</sup> | 2012 | Poland | Caucasian  | Hospital based | 160 | 104 | 526 | 790          | 208 | 426 | 164 | 798          | 0.0451* |
| 25 | Krivokuca et al <sup>41</sup>   | 2013 | Serbia | Caucasian  | Hospital based | 128 | 18  | 9   | 155          | 100 | 13  | 1   | 114          | 0.4401  |
| 26 | Hosseini et al <sup>42</sup>    | 2013 | Turkey | Caucasian  | Hospital based | 203 | 77  | 14  | 294          | 252 | 42  | 21  | 315          | 0.0000* |
| 27 | Smolarz et al <sup>43</sup>     | 2013 | Poland | Caucasian  | Hospital based | 8   | 8   | 34  | 50           | 14  | 26  | 10  | 50           | 0.7412  |
| 28 | Wasson et al <sup>1</sup>       | 2014 | India  | East Asian | Hospital based | 117 | 76  | 12  | 205          | 134 | 73  | 10  | 217          | 0.9885  |
|    |                                 |      |        |            |                |     |     |     | <b>21236</b> |     |     |     | <b>19407</b> |         |

\* Indicates statistical significance
